# Supplementary material
Source: Springer Nature journal article supplement (https://www.springermedizin.de/resource/supplementary/13058_2012_3200_MOESM4_ESM.pdf/9703476)

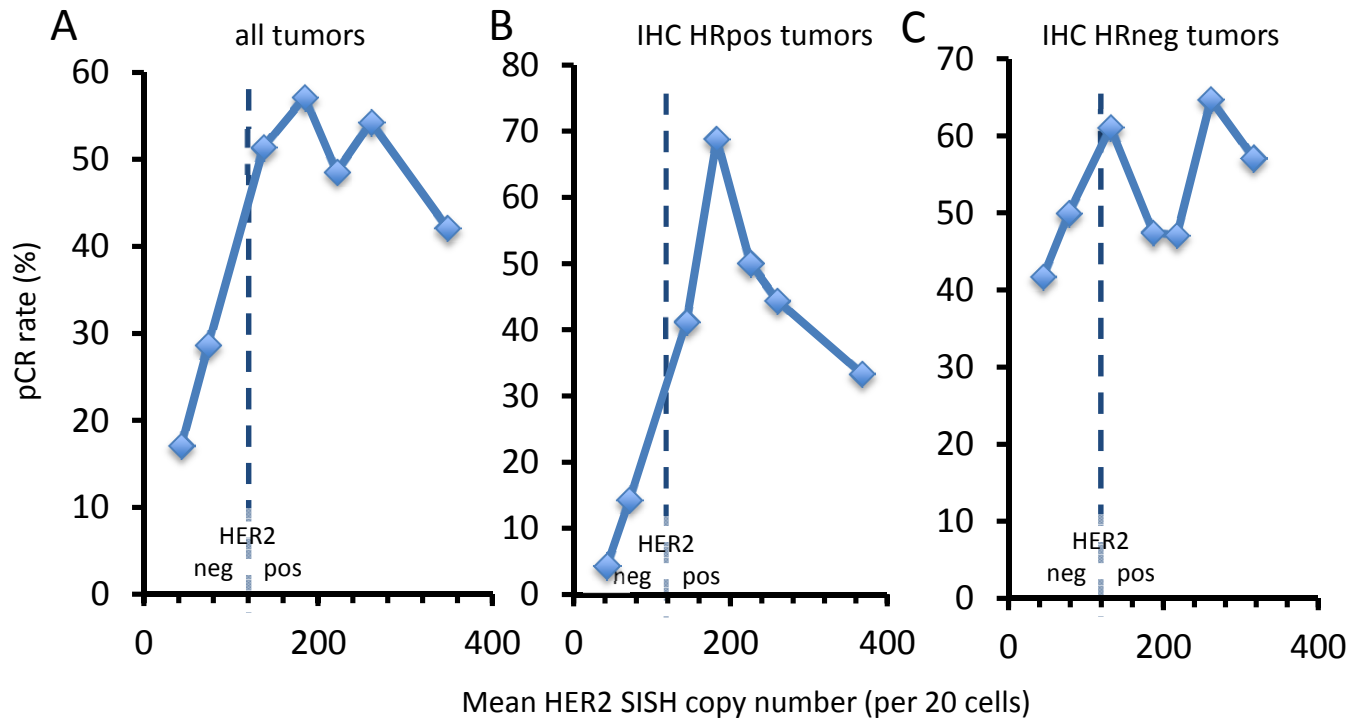

Supplement: MOESM4 [file 9703476]
